# Supplementary material
Source: PubMed Central journal article supplement (PMC5665847)
Supplement: ajcr0007-1996-f8.pdf [file ajcr0007-1996-f8.pdf]

## MiR-19b-3p promotes colorectal cancer growth and metastasis

**Supplementary Table 1.** Significant miRNA expression profiles in normal tissues compared to colorectal cancer

| Name             | id   | Base Mean | Base Mean A | Base Mean B | Fold Change | log2 Fold Change | Pval     | Padj     |
|------------------|------|-----------|-------------|-------------|-------------|------------------|----------|----------|
| hsa-miR-3195     | 629  | 25.91255  | 701.4833    | 13.3145     | 0.01898     | -5.71934         | 2.37E-05 | 0.000293 |
| hsa-miR-486-5p   | 1454 | 296.997   | 7709.552    | 158.7675    | 0.020594    | -5.60166         | 9.71E-15 | 7.46E-13 |
| hsa-miR-139-3p   | 226  | 32.24175  | 781.4074    | 18.27129    | 0.023383    | -5.41842         | 9.05E-19 | 1.31E-16 |
| hsa-miR-328-3p   | 653  | 82.10105  | 1942.38     | 47.41052    | 0.024408    | -5.35647         | 5.10E-39 | 1.26E-35 |
| hsa-miR-139-5p   | 227  | 91.8201   | 1906.706    | 57.97607    | 0.030406    | -5.03948         | 3.86E-30 | 2.37E-27 |
| hsa-miR-6511b-3p | 1978 | 5.226469  | 103.1142    | 3.401056    | 0.032983    | -4.92212         | 1.10E-27 | 4.52E-25 |
| hsa-miR-6511a-3p | 1976 | 8.195837  | 156.1021    | 5.437679    | 0.034834    | -4.84335         | 1.58E-30 | 1.30E-27 |
| hsa-miR-197-3p   | 347  | 313.8414  | 5951.1      | 208.7177    | 0.035072    | -4.83353         | 7.65E-38 | 9.41E-35 |
| hsa-miR-129-5p   | 181  | 14.29499  | 248.3588    | 9.930166    | 0.039983    | -4.64446         | 3.21E-06 | 4.84E-05 |
| hsa-miR-1224-5p  | 65   | 6.915863  | 113.1099    | 4.935555    | 0.043635    | -4.51837         | 0.005805 | 0.035522 |
| hsa-miR-187-3p   | 304  | 7.170571  | 116.46      | 5.132541    | 0.044071    | -4.50402         | 0.002746 | 0.018507 |
| hsa-miR-766-3p   | 2443 | 25.10778  | 385.0006    | 18.39649    | 0.047783    | -4.38736         | 1.46E-25 | 4.50E-23 |
| hsa-miR-642b-5p  | 1943 | 6.529753  | 94.88033    | 4.88219     | 0.051456    | -4.28051         | 9.16E-25 | 2.25E-22 |
| hsa-miR-642a-5p  | 1941 | 7.166034  | 103.7212    | 5.365471    | 0.05173     | -4.27286         | 6.56E-27 | 2.31E-24 |
| hsa-miR-1306-5p  | 196  | 20.11679  | 284.5236    | 15.18613    | 0.053374    | -4.22772         | 2.82E-23 | 5.78E-21 |
| hsa-miR-194-3p   | 337  | 951.5085  | 13263.77    | 721.9092    | 0.054427    | -4.19953         | 8.59E-28 | 4.22E-25 |
| hsa-let-7d-3p    | 8    | 421.8525  | 5759.314    | 322.3194    | 0.055965    | -4.15933         | 3.45E-25 | 9.42E-23 |
| hsa-miR-149-5p   | 256  | 42.36008  | 561.6529    | 32.6763     | 0.058179    | -4.10336         | 8.21E-14 | 5.61E-12 |
| hsa-miR-4532     | 1153 | 24.01759  | 316.2576    | 18.5679     | 0.058711    | -4.09022         | 0.000438 | 0.003859 |
| hsa-miR-125a-5p  | 114  | 524.996   | 6907.581    | 405.9734    | 0.058772    | -4.08872         | 1.32E-23 | 2.95E-21 |
| hsa-miR-490-3p   | 1463 | 8.69307   | 112.9091    | 6.749647    | 0.059779    | -4.06421         | 4.65E-05 | 0.00053  |
| hsa-miR-133a-3p  | 209  | 47.40008  | 594.4515    | 37.19866    | 0.062576    | -3.99824         | 2.23E-08 | 6.68E-07 |
| hsa-miR-671-3p   | 2021 | 5.980782  | 73.26626    | 4.726041    | 0.064505    | -3.95444         | 2.30E-18 | 3.14E-16 |
| hsa-miR-195-3p   | 339  | 5.627187  | 68.02997    | 4.463498    | 0.065611    | -3.92992         | 5.55E-17 | 6.20E-15 |
| hsa-miR-3656     | 734  | 44.34642  | 521.7528    | 35.44374    | 0.067932    | -3.87976         | 2.03E-06 | 3.25E-05 |
| hsa-miR-378a-5p  | 827  | 403.4314  | 4719.868    | 322.9384    | 0.068421    | -3.86942         | 3.47E-22 | 6.57E-20 |
| hsa-miR-193b-5p  | 336  | 8.04803   | 92.21883    | 6.478411    | 0.07025     | -3.83135         | 6.89E-18 | 8.47E-16 |
| hsa-miR-1180-3p  | 41   | 33.60934  | 385.0688    | 27.05532    | 0.070261    | -3.83113         | 2.52E-19 | 4.04E-17 |
| hsa-miR-1226-3p  | 69   | 3.509023  | 39.5984     | 2.836027    | 0.07162     | -3.8035          | 7.34E-14 | 5.16E-12 |
| hsa-miR-1296-5p  | 183  | 14.1093   | 159.0752    | 11.40597    | 0.071702    | -3.80185         | 6.65E-15 | 5.45E-13 |
| hsa-miR-145-5p   | 239  | 8152.049  | 86575.07    | 6689.615    | 0.07727     | -3.69396         | 1.81E-11 | 8.39E-10 |
| hsa-miR-150-5p   | 258  | 1386.199  | 14495.9     | 1141.729    | 0.078762    | -3.66635         | 3.54E-21 | 6.22E-19 |
| hsa-miR-3615     | 705  | 6.401324  | 66.1447     | 5.287229    | 0.079934    | -3.64504         | 3.11E-15 | 2.84E-13 |
| hsa-miR-181a-5p  | 286  | 2146.552  | 21790.22    | 1780.237    | 0.081699    | -3.61354         | 2.63E-19 | 4.04E-17 |
| hsa-miR-744-5p   | 2431 | 58.42131  | 589.8287    | 48.51162    | 0.082247    | -3.60389         | 1.94E-16 | 1.99E-14 |
| hsa-miR-150-3p   | 257  | 7.160982  | 72.06157    | 5.950715    | 0.082578    | -3.5981          | 6.95E-15 | 5.52E-13 |
| hsa-miR-574-3p   | 1816 | 91.68594  | 918.7596    | 76.26265    | 0.083006    | -3.59064         | 6.01E-17 | 6.43E-15 |
| hsa-miR-6724-5p  | 2037 | 3.759868  | 36.64197    | 3.146682    | 0.085876    | -3.54159         | 3.26E-12 | 1.67E-10 |
| hsa-let-7b-5p    | 5    | 13437.72  | 129370.9    | 11275.8     | 0.087159    | -3.52021         | 9.80E-18 | 1.15E-15 |
| hsa-miR-423-3p   | 911  | 179.8016  | 1605.537    | 153.2144    | 0.095429    | -3.38943         | 9.94E-16 | 9.40E-14 |
| hsa-miR-146b-3p  | 245  | 89.75184  | 782.0266    | 76.84229    | 0.09826     | -3.34725         | 5.48E-16 | 5.39E-14 |
| hsa-miR-7706     | 2454 | 4.894643  | 42.47602    | 4.193825    | 0.098734    | -3.34031         | 1.67E-12 | 8.94E-11 |
| hsa-miR-193a-5p  | 334  | 369.2766  | 3179.979    | 316.8626    | 0.099643    | -3.32709         | 2.70E-13 | 1.75E-11 |
| hsa-let-7b-3p    | 4    | 109.8896  | 942.4216    | 94.36452    | 0.10013     | -3.32006         | 1.02E-14 | 7.63E-13 |
| hsa-miR-532-3p   | 1632 | 72.79012  | 618.8993    | 62.60627    | 0.101157    | -3.30533         | 6.66E-14 | 4.82E-12 |
| hsa-miR-324-3p   | 648  | 28.83194  | 242.7887    | 24.84207    | 0.10232     | -3.28884         | 9.08E-14 | 6.03E-12 |
| hsa-miR-326      | 652  | 82.30884  | 692.3833    | 70.93216    | 0.102446    | -3.28706         | 1.14E-12 | 6.53E-11 |
| hsa-miR-1307-3p  | 197  | 3169.658  | 26535.96    | 2733.923    | 0.103027    | -3.2789          | 6.54E-15 | 5.45E-13 |

## MiR-19b-3p promotes colorectal cancer growth and metastasis

|                   |      |          |          |          |          |          |          |          |
|-------------------|------|----------|----------|----------|----------|----------|----------|----------|
| hsa-miR-92b-3p    | 2548 | 87.95365 | 725.5736 | 76.0633  | 0.104832 | -3.25385 | 3.60E-13 | 2.27E-11 |
| hsa-miR-1268b     | 131  | 12.62176 | 102.4199 | 10.94721 | 0.106886 | -3.22586 | 1.17E-12 | 6.54E-11 |
| hsa-miR-3127-5p   | 530  | 22.13094 | 177.5766 | 19.23218 | 0.108304 | -3.20685 | 9.46E-13 | 5.68E-11 |
| hsa-miR-342-5p    | 676  | 9.220269 | 73.88078 | 8.014479 | 0.108479 | -3.20452 | 2.61E-12 | 1.37E-10 |
| hsa-miR-2110      | 389  | 3.965436 | 31.06439 | 3.460094 | 0.111385 | -3.16638 | 6.02E-09 | 2.03E-07 |
| hsa-miR-3150b-3p  | 563  | 6.166556 | 47.54828 | 5.394869 | 0.113461 | -3.13973 | 6.31E-08 | 1.63E-06 |
| hsa-miR-1273h-3p  | 145  | 8.64038  | 65.41483 | 7.581649 | 0.115901 | -3.10903 | 1.51E-12 | 8.27E-11 |
| hsa-miR-375       | 816  | 73470.47 | 549550.1 | 64592.53 | 0.117537 | -3.08881 | 9.95E-13 | 5.83E-11 |
| hsa-miR-1268a     | 130  | 20.97387 | 155.2252 | 18.47035 | 0.118991 | -3.07108 | 1.42E-11 | 6.73E-10 |
| hsa-miR-133b      | 211  | 5.816792 | 42.2219  | 5.137909 | 0.121688 | -3.03874 | 0.000843 | 0.006873 |
| hsa-miR-5010-3p   | 1506 | 4.134032 | 29.62536 | 3.658669 | 0.123498 | -3.01744 | 6.28E-08 | 1.63E-06 |
| hsa-miR-7641      | 2441 | 953.8713 | 6822.903 | 844.4255 | 0.123763 | -3.01434 | 2.45E-06 | 3.81E-05 |
| hsa-miR-3142      | 551  | 4.206985 | 29.93022 | 3.727297 | 0.124533 | -3.0054  | 0.000258 | 0.002409 |
| hsa-let-7c-5p     | 7    | 14017.04 | 98695.44 | 12437.95 | 0.126024 | -2.98823 | 1.18E-11 | 5.82E-10 |
| hsa-miR-99b-5p    | 2578 | 20468.29 | 143837.3 | 18167.71 | 0.126307 | -2.98499 | 8.49E-11 | 3.60E-09 |
| hsa-miR-296-5p    | 469  | 9.962774 | 69.17026 | 8.858672 | 0.128071 | -2.96499 | 1.89E-06 | 3.09E-05 |
| hsa-miR-23a-5p    | 440  | 10.68558 | 73.77321 | 9.509122 | 0.128897 | -2.95571 | 3.36E-08 | 9.49E-07 |
| hsa-miR-4286      | 952  | 59.13546 | 405.8757 | 52.66944 | 0.129767 | -2.946   | 2.08E-11 | 9.50E-10 |
| hsa-miR-7704      | 2451 | 13.09205 | 88.93473 | 11.67774 | 0.131307 | -2.92899 | 0.000201 | 0.001929 |
| hsa-miR-3653      | 731  | 23.66718 | 159.3201 | 21.13752 | 0.132673 | -2.91405 | 3.36E-06 | 5.01E-05 |
| hsa-miR-361-3p    | 702  | 233.5454 | 1571.488 | 208.5954 | 0.132737 | -2.91335 | 2.99E-11 | 1.31E-09 |
| hsa-miR-193b-3p   | 335  | 30.08676 | 199.3063 | 26.93115 | 0.135124 | -2.88764 | 5.50E-10 | 2.11E-08 |
| hsa-miR-4492      | 1092 | 4.672774 | 30.0988  | 4.198629 | 0.139495 | -2.84172 | 0.002814 | 0.018865 |
| hsa-miR-432-5p    | 996  | 13.99142 | 88.79458 | 12.59649 | 0.141861 | -2.81745 | 2.38E-08 | 6.96E-07 |
| hsa-miR-6892-5p   | 2374 | 5.212119 | 32.87253 | 4.696308 | 0.142864 | -2.80728 | 1.64E-06 | 2.72E-05 |
| hsa-let-7e-3p     | 10   | 8.306276 | 49.83342 | 7.531877 | 0.151141 | -2.72603 | 3.39E-07 | 6.89E-06 |
| hsa-miR-484       | 1450 | 169.4388 | 1006.272 | 153.8335 | 0.152875 | -2.70958 | 1.46E-09 | 5.19E-08 |
| hsa-miR-1260a     | 118  | 164.1607 | 962.1947 | 149.279  | 0.155144 | -2.68832 | 3.55E-08 | 9.80E-07 |
| hsa-miR-874-3p    | 2517 | 53.64413 | 306.5116 | 48.92865 | 0.159631 | -2.64719 | 1.51E-08 | 4.69E-07 |
| hsa-miR-125b-5p   | 117  | 472.2057 | 2693.844 | 430.7765 | 0.159911 | -2.64465 | 9.48E-08 | 2.24E-06 |
| hsa-miR-6842-3p   | 2277 | 8.302347 | 46.86734 | 7.583186 | 0.161801 | -2.62771 | 1.14E-06 | 1.98E-05 |
| hsa-miR-30c-2-3p  | 506  | 24.48187 | 137.9223 | 22.36643 | 0.162167 | -2.62445 | 2.75E-07 | 5.88E-06 |
| hsa-miR-219a-1-3p | 416  | 5.247507 | 29.44282 | 4.796312 | 0.162903 | -2.61792 | 2.83E-07 | 6.01E-06 |
| hsa-miR-574-5p    | 1817 | 56.7917  | 317.971  | 51.92123 | 0.163289 | -2.6145  | 4.79E-08 | 1.29E-06 |
| hsa-miR-99b-3p    | 2577 | 44.13884 | 246.4456 | 40.36622 | 0.163794 | -2.61005 | 8.47E-08 | 2.05E-06 |
| hsa-miR-378a-3p   | 826  | 2876.293 | 15754.58 | 2636.138 | 0.167325 | -2.57927 | 1.87E-08 | 5.74E-07 |
| hsa-miR-941       | 2563 | 22.55735 | 123.3881 | 20.67706 | 0.167577 | -2.5771  | 1.97E-07 | 4.28E-06 |
| hsa-miR-15b-5p    | 278  | 460.7649 | 2518.988 | 422.3831 | 0.16768  | -2.57622 | 1.91E-08 | 5.81E-07 |
| hsa-miR-3605-3p   | 690  | 9.706167 | 52.24242 | 8.91295  | 0.170608 | -2.55125 | 5.48E-07 | 1.05E-05 |
| hsa-miR-3928-3p   | 874  | 3.592234 | 18.99619 | 3.304981 | 0.173981 | -2.523   | 2.41E-06 | 3.77E-05 |
| hsa-miR-1468-5p   | 241  | 12.3878  | 65.02337 | 11.40625 | 0.175418 | -2.51113 | 2.89E-07 | 6.08E-06 |
| hsa-miR-1260b     | 119  | 156.0927 | 813.6991 | 143.8296 | 0.17676  | -2.50013 | 1.03E-06 | 1.82E-05 |
| hsa-miR-370-3p    | 798  | 8.619851 | 44.65858 | 7.947801 | 0.177968 | -2.49031 | 3.44E-06 | 5.10E-05 |
| hsa-miR-7977      | 2474 | 5.347183 | 27.6041  | 4.932136 | 0.178674 | -2.4846  | 0.000437 | 0.003859 |
| hsa-miR-654-5p    | 1997 | 6.679729 | 34.15161 | 6.167433 | 0.18059  | -2.46921 | 1.11E-06 | 1.94E-05 |
| hsa-miR-1273h-5p  | 146  | 4.899958 | 24.67781 | 4.53114  | 0.183612 | -2.44527 | 1.20E-06 | 2.04E-05 |
| hsa-miR-589-5p    | 1840 | 132.8953 | 665.4246 | 122.9646 | 0.184791 | -2.43603 | 3.35E-07 | 6.87E-06 |
| hsa-miR-629-3p    | 1926 | 15.18984 | 74.7693  | 14.0788  | 0.188296 | -2.40892 | 1.84E-07 | 4.08E-06 |
| hsa-miR-937-3p    | 2556 | 9.457574 | 45.24184 | 8.790268 | 0.194295 | -2.36368 | 7.29E-06 | 0.000101 |
| hsa-miR-377-5p    | 825  | 4.245566 | 20.08042 | 3.950277 | 0.196723 | -2.34576 | 0.000149 | 0.001505 |
| hsa-miR-92a-3p    | 2547 | 23315.85 | 108179   | 21733.32 | 0.200901 | -2.31544 | 1.41E-06 | 2.38E-05 |
| hsa-miR-29b-2-5p  | 477  | 35.25288 | 162.902  | 32.87247 | 0.201793 | -2.30905 | 1.36E-06 | 2.31E-05 |

## MiR-19b-3p promotes colorectal cancer growth and metastasis

|                   |      |          |          |          |          |          |          |          |
|-------------------|------|----------|----------|----------|----------|----------|----------|----------|
| hsa-miR-939-5p    | 2560 | 5.091265 | 23.45382 | 4.74884  | 0.202476 | -2.30418 | 3.40E-05 | 0.0004   |
| hsa-miR-3614-5p   | 704  | 10.10058 | 46.34806 | 9.424637 | 0.203345 | -2.298   | 1.31E-05 | 0.000168 |
| hsa-miR-132-3p    | 206  | 253.1919 | 1082.849 | 237.7204 | 0.219532 | -2.18749 | 5.93E-06 | 8.33E-05 |
| hsa-miR-3074-5p   | 500  | 18.39725 | 78.06426 | 17.28458 | 0.221415 | -2.17518 | 7.45E-06 | 0.000102 |
| hsa-miR-140-3p    | 228  | 709.1641 | 3006.666 | 666.3203 | 0.221614 | -2.17388 | 7.15E-06 | 9.93E-05 |
| hsa-miR-125b-2-3p | 116  | 4.776723 | 19.96946 | 4.493408 | 0.225014 | -2.15191 | 0.000894 | 0.007213 |
| hsa-miR-652-3p    | 1992 | 60.75837 | 253.0108 | 57.17324 | 0.225972 | -2.14579 | 3.98E-06 | 5.75E-05 |
| hsa-miR-185-3p    | 300  | 6.561655 | 27.23486 | 6.17614  | 0.226773 | -2.14068 | 0.00018  | 0.001757 |
| hsa-miR-4746-5p   | 1352 | 8.553894 | 35.20079 | 8.056982 | 0.228886 | -2.1273  | 3.43E-05 | 0.000401 |
| hsa-miR-1247-5p   | 96   | 120.5349 | 486.6075 | 113.7084 | 0.233676 | -2.09742 | 0.000139 | 0.001423 |
| hsa-miR-877-5p    | 2524 | 6.236984 | 24.64999 | 5.893618 | 0.239092 | -2.06436 | 0.000253 | 0.002376 |
| hsa-miR-331-3p    | 659  | 31.4319  | 122.9842 | 29.72464 | 0.241695 | -2.04874 | 4.22E-05 | 0.000483 |
| hsa-miR-431-3p    | 981  | 23.75834 | 92.71209 | 22.47249 | 0.24239  | -2.0446  | 0.00019  | 0.001845 |
| hsa-miR-423-5p    | 912  | 55.97321 | 216.4412 | 52.9808  | 0.244782 | -2.03043 | 0.000171 | 0.001687 |
| hsa-miR-339-5p    | 668  | 109.532  | 417.2508 | 103.7937 | 0.248756 | -2.0072  | 2.45E-05 | 0.000301 |
| hsa-miR-320a      | 638  | 627.8297 | 2339.304 | 595.9141 | 0.25474  | -1.9729  | 6.76E-05 | 0.000749 |
| hsa-miR-491-5p    | 1466 | 3.95618  | 14.57491 | 3.758161 | 0.257851 | -1.95539 | 0.002638 | 0.017829 |
| hsa-miR-323a-3p   | 643  | 3.999895 | 14.58794 | 3.802449 | 0.260657 | -1.93978 | 0.001316 | 0.010076 |
| hsa-miR-191-3p    | 325  | 18.89524 | 67.29973 | 17.9926  | 0.26735  | -1.9032  | 5.01E-05 | 0.000565 |
| hsa-miR-128-1-5p  | 156  | 17.58859 | 62.45578 | 16.75191 | 0.26822  | -1.89851 | 0.000227 | 0.002144 |
| hsa-miR-503-3p    | 1514 | 3.869819 | 13.68829 | 3.686724 | 0.269334 | -1.89253 | 0.00408  | 0.02607  |
| hsa-miR-330-3p    | 657  | 7.363408 | 25.82285 | 7.019175 | 0.27182  | -1.87927 | 0.000925 | 0.007366 |
| hsa-miR-200c-3p   | 364  | 9833.096 | 33831.85 | 9385.567 | 0.277418 | -1.84987 | 0.00018  | 0.001757 |
| hsa-miR-214-3p    | 403  | 19.15192 | 64.97926 | 18.29733 | 0.281587 | -1.82835 | 0.000937 | 0.007416 |
| hsa-miR-505-5p    | 1520 | 16.71789 | 56.0949  | 15.98359 | 0.284938 | -1.81128 | 0.000516 | 0.004483 |
| hsa-miR-324-5p    | 649  | 43.30729 | 145.0309 | 41.41035 | 0.285528 | -1.8083  | 0.000193 | 0.001861 |
| hsa-miR-127-3p    | 147  | 1096.213 | 3635.633 | 1048.858 | 0.288494 | -1.79339 | 0.000632 | 0.005344 |
| hsa-miR-4326      | 997  | 19.57168 | 63.8683  | 18.74564 | 0.293505 | -1.76855 | 0.000774 | 0.006429 |
| hsa-miR-378i      | 835  | 376.7219 | 1170.792 | 361.9141 | 0.309119 | -1.69377 | 0.000711 | 0.005993 |
| hsa-miR-1266-5p   | 128  | 63.23403 | 195.9807 | 60.75857 | 0.310023 | -1.68955 | 0.000593 | 0.005029 |
| hsa-miR-18a-3p    | 308  | 5.806211 | 17.96418 | 5.579489 | 0.31059  | -1.68692 | 0.001665 | 0.012414 |
| hsa-miR-1301-3p   | 188  | 10.1356  | 30.62769 | 9.753463 | 0.318452 | -1.65085 | 0.002951 | 0.019621 |
| hsa-miR-378c      | 829  | 376.6414 | 1122.943 | 362.7244 | 0.323012 | -1.63034 | 0.001257 | 0.009663 |
| hsa-let-7i-3p     | 17   | 128.09   | 381.4153 | 123.366  | 0.323443 | -1.62842 | 0.000745 | 0.006235 |
| hsa-miR-338-5p    | 666  | 16.426   | 48.38367 | 15.83005 | 0.327178 | -1.61185 | 0.005305 | 0.033041 |
| hsa-miR-342-3p    | 675  | 96.49705 | 283.6436 | 93.00714 | 0.327901 | -1.60867 | 0.000796 | 0.00657  |
| hsa-miR-320b      | 639  | 530.7052 | 1552.19  | 511.6566 | 0.329635 | -1.60106 | 0.001873 | 0.013438 |
| hsa-miR-181b-5p   | 288  | 340.1672 | 988.4352 | 328.0783 | 0.331917 | -1.59111 | 0.00117  | 0.009038 |
| hsa-miR-505-3p    | 1519 | 120.2167 | 346.5526 | 115.996  | 0.334714 | -1.579   | 0.001748 | 0.012835 |
| hsa-miR-3934-5p   | 878  | 3.780528 | 10.5751  | 3.653822 | 0.345512 | -1.53319 | 0.00804  | 0.047314 |
| hsa-miR-106b-3p   | 31   | 992.1591 | 2760.605 | 959.1811 | 0.347453 | -1.52511 | 0.004111 | 0.026133 |
| hsa-miR-3130-5p   | 535  | 11.5858  | 32.17941 | 11.20177 | 0.348103 | -1.52241 | 0.007197 | 0.043076 |
| hsa-miR-200b-5p   | 363  | 226.4931 | 616.7961 | 219.2148 | 0.355409 | -1.49245 | 0.003173 | 0.020851 |
| hsa-miR-455-3p    | 1165 | 622.7586 | 1554.322 | 605.3868 | 0.389486 | -1.36036 | 0.006517 | 0.039391 |
| hsa-miR-664a-3p   | 2012 | 34.88704 | 86.04483 | 33.93305 | 0.394365 | -1.3424  | 0.007215 | 0.043078 |
| hsa-miR-30e-5p    | 511  | 10047.43 | 1979.507 | 10197.88 | 5.151726 | 2.365056 | 0.005255 | 0.032808 |
| hsa-miR-218-5p    | 415  | 39.07111 | 6.802227 | 39.67286 | 5.832335 | 2.544074 | 0.003597 | 0.023164 |
| hsa-miR-10b-5p    | 37   | 137003.2 | 23387.21 | 139121.9 | 5.948633 | 2.572558 | 0.002965 | 0.019657 |
| hsa-miR-152-3p    | 262  | 349.014  | 59.45517 | 354.4137 | 5.961023 | 2.57556  | 0.002072 | 0.014608 |
| hsa-miR-451a      | 1130 | 695.1483 | 118.347  | 705.9045 | 5.964704 | 2.57645  | 0.002367 | 0.016401 |
| hsa-miR-10a-5p    | 35   | 146523   | 24891.25 | 148791.2 | 5.977652 | 2.579579 | 0.002945 | 0.019621 |
| hsa-miR-338-3p    | 665  | 1146.718 | 189.9488 | 1164.56  | 6.130916 | 2.616103 | 0.002411 | 0.016613 |

## MiR-19b-3p promotes colorectal cancer growth and metastasis

|                  |      |          |          |          |          |          |          |          |
|------------------|------|----------|----------|----------|----------|----------|----------|----------|
| hsa-miR-21-3p    | 402  | 2293.771 | 362.673  | 2329.782 | 6.423918 | 2.683453 | 0.002401 | 0.016589 |
| hsa-miR-10a-3p   | 34   | 20.4245  | 3.106106 | 20.74745 | 6.679571 | 2.739755 | 0.004843 | 0.030395 |
| hsa-miR-22-5p    | 430  | 56.88366 | 8.417513 | 57.78746 | 6.865147 | 2.779291 | 0.001833 | 0.013344 |
| hsa-miR-183-5p   | 298  | 21744.03 | 3172.543 | 22090.35 | 6.962978 | 2.799704 | 0.001172 | 0.009038 |
| hsa-miR-192-5p   | 332  | 181691   | 25831.69 | 184597.5 | 7.146163 | 2.837169 | 0.001853 | 0.013438 |
| hsa-miR-26b-5p   | 459  | 2041.818 | 289.8145 | 2074.49  | 7.157992 | 2.839555 | 0.000813 | 0.006692 |
| hsa-miR-3677-3p  | 764  | 19.89858 | 2.738012 | 20.21859 | 7.384407 | 2.884482 | 0.005695 | 0.034939 |
| hsa-miR-337-3p   | 663  | 32.54284 | 4.428856 | 33.06711 | 7.466287 | 2.900391 | 0.003332 | 0.021628 |
| hsa-miR-598-3p   | 1851 | 34.95979 | 4.754345 | 35.52306 | 7.471704 | 2.901437 | 0.002317 | 0.0161   |
| hsa-miR-185-5p   | 301  | 124.7783 | 16.93777 | 126.7893 | 7.485595 | 2.904117 | 0.001439 | 0.010928 |
| hsa-miR-199a-3p  | 351  | 3749.697 | 480.6404 | 3810.659 | 7.928294 | 2.98701  | 0.000917 | 0.00735  |
| hsa-miR-199b-3p  | 353  | 3749.697 | 480.6404 | 3810.659 | 7.928294 | 2.98701  | 0.000917 | 0.00735  |
| hsa-miR-30b-5p   | 504  | 810.229  | 93.21965 | 823.5998 | 8.835045 | 3.143237 | 0.000456 | 0.004007 |
| hsa-miR-193a-3p  | 333  | 19.1093  | 2.147505 | 19.4256  | 9.045662 | 3.177226 | 0.001678 | 0.012466 |
| hsa-miR-223-5p   | 426  | 9.867993 | 0.962526 | 10.03406 | 10.42471 | 3.381936 | 0.003026 | 0.020009 |
| hsa-miR-195-5p   | 340  | 80.54483 | 7.849763 | 81.90045 | 10.43349 | 3.38315  | 0.000311 | 0.00288  |
| hsa-miR-455-5p   | 1166 | 38.05734 | 3.500182 | 38.70176 | 11.05707 | 3.466898 | 0.000286 | 0.002655 |
| hsa-miR-126-3p   | 123  | 1800.668 | 159.6419 | 1831.269 | 11.4711  | 3.519932 | 0.000112 | 0.001182 |
| hsa-miR-17-5p    | 283  | 1076.097 | 92.82846 | 1094.433 | 11.78985 | 3.559473 | 0.000165 | 0.001639 |
| hsa-miR-7-1-3p   | 2402 | 89.55108 | 7.625556 | 91.07882 | 11.94389 | 3.578201 | 0.000182 | 0.001771 |
| hsa-miR-660-5p   | 2007 | 112.3921 | 9.467646 | 114.3115 | 12.07391 | 3.593821 | 0.000139 | 0.001423 |
| hsa-miR-15b-3p   | 277  | 47.42316 | 3.960854 | 48.23364 | 12.17758 | 3.606156 | 0.000353 | 0.00318  |
| hsa-miR-148a-3p  | 251  | 90921.89 | 7544.823 | 92476.71 | 12.25698 | 3.615531 | 0.000145 | 0.001469 |
| hsa-miR-106a-5p  | 30   | 738.3902 | 59.79972 | 751.0445 | 12.55933 | 3.650688 | 0.000137 | 0.001413 |
| hsa-miR-199b-5p  | 354  | 252.6002 | 20.34823 | 256.9312 | 12.62671 | 3.658407 | 7.11E-05 | 0.000781 |
| hsa-miR-127-5p   | 149  | 596.8146 | 48.06226 | 607.0477 | 12.63045 | 3.658834 | 9.93E-05 | 0.001057 |
| hsa-miR-217      | 412  | 90.86857 | 7.164997 | 92.42947 | 12.90014 | 3.689315 | 0.000759 | 0.006329 |
| hsa-miR-188-5p   | 307  | 15.98609 | 1.251859 | 16.26085 | 12.98937 | 3.699259 | 0.000924 | 0.007366 |
| hsa-miR-200a-3p  | 360  | 800.157  | 59.29697 | 813.9726 | 13.72705 | 3.77895  | 7.53E-05 | 0.000824 |
| hsa-miR-140-5p   | 229  | 104.068  | 7.184831 | 105.8746 | 14.73586 | 3.881259 | 6.17E-05 | 0.000687 |
| hsa-miR-376a-3p  | 818  | 7.232895 | 0.481263 | 7.3588   | 15.29059 | 3.934572 | 0.003342 | 0.021637 |
| hsa-miR-379-5p   | 838  | 1867.398 | 121.8397 | 1899.949 | 15.59385 | 3.962905 | 1.88E-05 | 0.000236 |
| hsa-miR-552-3p   | 1730 | 101.9181 | 6.587911 | 103.6959 | 15.74032 | 3.976393 | 5.15E-05 | 0.000578 |
| hsa-miR-374b-5p  | 813  | 167.3001 | 10.75684 | 170.2193 | 15.82429 | 3.984069 | 2.97E-05 | 0.000358 |
| hsa-miR-16-5p    | 281  | 1160.917 | 72.34482 | 1181.216 | 16.32759 | 4.02924  | 3.40E-05 | 0.0004   |
| hsa-miR-301a-5p  | 483  | 17.04604 | 1.058429 | 17.34418 | 16.38672 | 4.034455 | 0.001428 | 0.010873 |
| hsa-miR-29a-5p   | 475  | 32.53858 | 1.884352 | 33.11023 | 17.57114 | 4.135136 | 0.000167 | 0.001651 |
| hsa-miR-16-1-3p  | 279  | 10.54332 | 0.599242 | 10.72876 | 17.90389 | 4.162201 | 0.00252  | 0.017219 |
| hsa-miR-19b-1-5p | 357  | 32.25181 | 1.81228  | 32.81945 | 18.10948 | 4.178673 | 0.000153 | 0.001532 |
| hsa-miR-24-2-5p  | 445  | 61.72163 | 3.402578 | 62.80916 | 18.45929 | 4.206275 | 2.80E-05 | 0.000339 |
| hsa-miR-889-3p   | 2531 | 19.89042 | 1.07995  | 20.2412  | 18.74271 | 4.228258 | 0.00012  | 0.001253 |
| hsa-miR-215-5p   | 406  | 5175.577 | 272.1843 | 5267.016 | 19.35091 | 4.27433  | 7.54E-06 | 0.000103 |
| hsa-miR-411-5p   | 906  | 21.6218  | 1.117696 | 22.00416 | 19.68707 | 4.299177 | 0.000398 | 0.003563 |
| hsa-miR-2355-5p  | 437  | 75.57241 | 3.818884 | 76.91047 | 20.13951 | 4.331957 | 2.32E-05 | 0.000289 |
| hsa-miR-203a     | 368  | 33469.95 | 1635.819 | 34063.6  | 20.82358 | 4.380146 | 8.23E-06 | 0.000112 |
| hsa-miR-335-3p   | 661  | 308.211  | 14.46693 | 313.6888 | 21.68316 | 4.438503 | 1.15E-05 | 0.000152 |
| hsa-miR-1307-5p  | 198  | 1383.651 | 63.24947 | 1408.274 | 22.26539 | 4.476731 | 8.74E-06 | 0.000118 |
| hsa-miR-16-2-3p  | 280  | 11.92617 | 0.531814 | 12.13866 | 22.82498 | 4.512542 | 0.001542 | 0.011598 |
| hsa-miR-29b-3p   | 478  | 2310.667 | 102.8291 | 2351.839 | 22.87134 | 4.515469 | 3.68E-06 | 5.40E-05 |
| hsa-miR-101-5p   | 23   | 15.11131 | 0.636226 | 15.38124 | 24.17576 | 4.595489 | 0.000496 | 0.004339 |
| hsa-miR-452-5p   | 1145 | 258.9823 | 10.63358 | 263.6135 | 24.79066 | 4.631725 | 5.15E-06 | 7.28E-05 |
| hsa-miR-106b-5p  | 32   | 713.1934 | 27.68836 | 725.9767 | 26.21956 | 4.712572 | 1.95E-06 | 3.16E-05 |
| hsa-miR-503-5p   | 1515 | 23.74346 | 0.858469 | 24.17022 | 28.15503 | 4.815321 | 0.000136 | 0.00141  |

## MiR-19b-3p promotes colorectal cancer growth and metastasis

|                  |      |          |          |          |          |          |          |          |
|------------------|------|----------|----------|----------|----------|----------|----------|----------|
| hsa-miR-340-5p   | 674  | 32.00443 | 1.15468  | 32.57972 | 28.21537 | 4.81841  | 6.06E-05 | 0.000678 |
| hsa-miR-582-5p   | 1830 | 26.33238 | 0.871829 | 26.80717 | 30.74818 | 4.942429 | 8.71E-05 | 0.00094  |
| hsa-miR-20a-5p   | 384  | 1245.153 | 40.48084 | 1267.618 | 31.31401 | 4.968736 | 1.16E-06 | 1.99E-05 |
| hsa-miR-141-5p   | 231  | 1790.025 | 57.23668 | 1822.339 | 31.83865 | 4.992707 | 9.56E-07 | 1.72E-05 |
| hsa-miR-136-3p   | 220  | 10.04082 | 0.318113 | 10.22213 | 32.13366 | 5.006013 | 0.000888 | 0.007187 |
| hsa-miR-4677-3p  | 1240 | 8.270769 | 0.259227 | 8.420168 | 32.48184 | 5.021562 | 0.002282 | 0.015902 |
| hsa-miR-182-5p   | 295  | 39010.38 | 1219.708 | 39715.1  | 32.56115 | 5.02508  | 5.52E-07 | 1.05E-05 |
| hsa-miR-141-3p   | 230  | 868.1016 | 26.8161  | 883.7899 | 32.95743 | 5.042532 | 1.06E-06 | 1.87E-05 |
| hsa-miR-651-5p   | 1989 | 8.469031 | 0.259227 | 8.622127 | 33.26092 | 5.055756 | 0.001969 | 0.013961 |
| hsa-miR-1        | 19   | 67.9064  | 2.001746 | 69.1354  | 34.53755 | 5.110094 | 0.002587 | 0.017578 |
| hsa-miR-552-5p   | 1731 | 342.3273 | 9.635283 | 348.5313 | 36.1724  | 5.176817 | 6.79E-07 | 1.25E-05 |
| hsa-miR-96-5p    | 2572 | 47.27156 | 1.272451 | 48.12935 | 37.82411 | 5.241234 | 1.04E-05 | 0.000138 |
| hsa-miR-708-5p   | 2382 | 56.49566 | 1.516964 | 57.5209  | 37.91844 | 5.244828 | 3.87E-06 | 5.63E-05 |
| hsa-miR-136-5p   | 221  | 64.73582 | 1.716176 | 65.91101 | 38.40574 | 5.26325  | 2.61E-06 | 4.03E-05 |
| hsa-miR-222-5p   | 424  | 33.0569  | 0.872917 | 33.65706 | 38.55699 | 5.26892  | 1.52E-05 | 0.000195 |
| hsa-miR-101-3p   | 22   | 9467.777 | 241.9745 | 9639.82  | 39.83816 | 5.316079 | 1.58E-07 | 3.56E-06 |
| hsa-miR-708-3p   | 2381 | 83.74956 | 2.116858 | 85.27185 | 40.28227 | 5.332073 | 1.94E-06 | 3.16E-05 |
| hsa-miR-144-5p   | 237  | 164.1136 | 4.122318 | 167.0971 | 40.53475 | 5.341087 | 3.00E-07 | 6.22E-06 |
| hsa-miR-582-3p   | 1829 | 930.3941 | 23.0351  | 947.3145 | 41.12482 | 5.361937 | 1.06E-07 | 2.45E-06 |
| hsa-miR-4791     | 1425 | 10.51081 | 0.259227 | 10.70198 | 41.28422 | 5.367518 | 0.00096  | 0.007565 |
| hsa-let-7a-3p    | 2    | 93.25915 | 2.227938 | 94.9567  | 42.62089 | 5.413489 | 2.06E-06 | 3.25E-05 |
| hsa-miR-429      | 956  | 327.0786 | 7.663613 | 333.0351 | 43.45667 | 5.441506 | 3.56E-07 | 7.17E-06 |
| hsa-miR-203b-3p  | 369  | 539.8223 | 11.16712 | 549.6806 | 49.22312 | 5.621264 | 1.12E-07 | 2.58E-06 |
| hsa-miR-33b-5p   | 672  | 15.93549 | 0.318113 | 16.22672 | 51.00932 | 5.672689 | 0.000856 | 0.006951 |
| hsa-miR-126-5p   | 126  | 425.5089 | 8.423291 | 433.2867 | 51.43912 | 5.684794 | 8.56E-08 | 2.05E-06 |
| hsa-miR-374a-5p  | 811  | 86.49797 | 1.620654 | 88.08076 | 54.34889 | 5.764179 | 4.35E-07 | 8.64E-06 |
| hsa-miR-153-5p   | 265  | 102.3651 | 1.408396 | 104.2477 | 74.0188  | 6.20982  | 3.01E-06 | 4.59E-05 |
| hsa-let-7f-2-3p  | 13   | 23.48096 | 0.318113 | 23.9129  | 75.17111 | 6.232106 | 1.73E-05 | 0.00022  |
| hsa-miR-301a-3p  | 482  | 20.45777 | 0.259227 | 20.83444 | 80.37142 | 6.328611 | 4.02E-05 | 0.000463 |
| hsa-miR-33a-5p   | 670  | 145.295  | 1.673133 | 147.9733 | 88.44081 | 6.46664  | 1.94E-07 | 4.26E-06 |
| hsa-miR-542-3p   | 1638 | 357.7569 | 3.923463 | 364.3551 | 92.86571 | 6.537074 | 6.59E-09 | 2.19E-07 |
| hsa-miR-21-5p    | 407  | 484310.7 | 4983.408 | 493249.2 | 98.97828 | 6.62904  | 2.17E-09 | 7.64E-08 |
| hsa-miR-142-3p   | 232  | 6616.125 | 50.08807 | 6738.568 | 134.5344 | 7.071831 | 5.46E-10 | 2.11E-08 |
| hsa-miR-135a-5p  | 217  | 126.4526 | 0.871829 | 128.7945 | 147.729  | 7.206809 | 3.54E-08 | 9.80E-07 |
| hsa-miR-577      | 1821 | 279.2024 | 1.709484 | 284.3771 | 166.3526 | 7.378101 | 2.89E-06 | 4.45E-05 |
| hsa-miR-424-5p   | 914  | 333.4213 | 1.989921 | 339.6018 | 170.6609 | 7.414989 | 7.48E-10 | 2.83E-08 |
| hsa-miR-590-5p   | 1842 | 47.23186 | 0.272588 | 48.10756 | 176.4848 | 7.4634   | 6.51E-07 | 1.20E-05 |
| hsa-miR-142-5p   | 233  | 243.3581 | 1.403263 | 247.87   | 176.6383 | 7.464654 | 2.26E-09 | 7.83E-08 |
| hsa-miR-374a-3p  | 810  | 1178.285 | 6.223592 | 1200.142 | 192.8375 | 7.591241 | 6.67E-11 | 2.88E-09 |
| hsa-miR-135b-5p  | 219  | 79.31846 | 0.340015 | 80.79125 | 237.6109 | 7.892457 | 3.88E-08 | 1.06E-06 |
| hsa-miR-32-5p    | 651  | 68.66026 | 0.272588 | 69.93555 | 256.5618 | 8.003163 | 7.16E-08 | 1.80E-06 |
| hsa-miR-19b-3p   | 359  | 311.6285 | 0.889942 | 317.4231 | 356.6786 | 8.478481 | 1.01E-10 | 4.21E-09 |
| hsa-miR-135b-3p  | 218  | 5.73676  | 0        | 5.843739 | Inf      | Inf      | 0.004109 | 0.026133 |
| hsa-miR-144-3p   | 236  | 21.04329 | 0        | 21.43571 | Inf      | Inf      | 8.25E-05 | 0.000898 |
| hsa-miR-153-3p   | 264  | 8.694724 | 0        | 8.856863 | Inf      | Inf      | 0.000314 | 0.002896 |
| hsa-miR-181b-3p  | 287  | 18.32387 | 0        | 18.66558 | Inf      | Inf      | 1.30E-05 | 0.000168 |
| hsa-miR-18a-5p   | 309  | 30.3168  | 0        | 30.88215 | Inf      | Inf      | 8.44E-07 | 1.54E-05 |
| hsa-miR-18b-5p   | 311  | 21.42392 | 0        | 21.82344 | Inf      | Inf      | 5.08E-06 | 7.23E-05 |
| hsa-miR-190a-5p  | 317  | 11.78169 | 0        | 12.0014  | Inf      | Inf      | 8.78E-05 | 0.000943 |
| hsa-miR-19a-3p   | 355  | 154.1403 | 0        | 157.0147 | Inf      | Inf      | 1.93E-10 | 7.79E-09 |
| hsa-miR-26a-1-3p | 455  | 10.0573  | 0        | 10.24484 | Inf      | Inf      | 0.00052  | 0.004503 |
| hsa-miR-26a-2-3p | 456  | 11.46325 | 0        | 11.67701 | Inf      | Inf      | 0.000109 | 0.001158 |

## MiR-19b-3p promotes colorectal cancer growth and metastasis

|                 |      |          |   |          |     |     |          |          |
|-----------------|------|----------|---|----------|-----|-----|----------|----------|
| hsa-miR-335-5p  | 662  | 44.96798 | 0 | 45.80655 | Inf | Inf | 1.13E-07 | 2.58E-06 |
| hsa-miR-3613-5p | 701  | 34.84435 | 0 | 35.49412 | Inf | Inf | 4.65E-07 | 9.14E-06 |
| hsa-miR-369-3p  | 796  | 7.090954 | 0 | 7.223186 | Inf | Inf | 0.000818 | 0.006707 |
| hsa-miR-374b-3p | 812  | 6.022013 | 0 | 6.134312 | Inf | Inf | 0.001608 | 0.01202  |
| hsa-miR-376c-3p | 822  | 5.01555  | 0 | 5.109081 | Inf | Inf | 0.002867 | 0.019163 |
| hsa-miR-450a-5p | 1117 | 14.24286 | 0 | 14.50846 | Inf | Inf | 3.25E-05 | 0.000387 |
| hsa-miR-450b-5p | 1119 | 23.11534 | 0 | 23.5464  | Inf | Inf | 3.19E-06 | 4.84E-05 |
| hsa-miR-454-3p  | 1163 | 16.50982 | 0 | 16.81769 | Inf | Inf | 1.70E-05 | 0.000217 |
| hsa-miR-495-3p  | 1472 | 6.233747 | 0 | 6.349994 | Inf | Inf | 0.001319 | 0.010076 |
| hsa-miR-548f-3p | 1694 | 4.419817 | 0 | 4.502238 | Inf | Inf | 0.005104 | 0.031949 |
| hsa-miR-590-3p  | 1841 | 10.82339 | 0 | 11.02523 | Inf | Inf | 0.000136 | 0.00141  |
| hsa-miR-592     | 1844 | 93.57421 | 0 | 95.31919 | Inf | Inf | 1.02E-07 | 2.38E-06 |
| hsa-miR-628-5p  | 1925 | 54.68006 | 0 | 55.69974 | Inf | Inf | 6.87E-08 | 1.74E-06 |
| hsa-miR-671-5p  | 2025 | 4.938473 | 0 | 5.030566 | Inf | Inf | 0.003276 | 0.021321 |
| hsa-miR-7-5p    | 2436 | 36.8128  | 0 | 37.49929 | Inf | Inf | 3.01E-07 | 6.22E-06 |
| hsa-miR-98-3p   | 2573 | 11.95185 | 0 | 12.17473 | Inf | Inf | 8.44E-05 | 0.000915 |

**Supplementary Table 2.** Association between miR-19b-3p expression and clinic-pathological characteristics of colorectal cancer

| Clinical Variables | miR-19b-3p |      |          |
|--------------------|------------|------|----------|
|                    | Low        | High | <i>P</i> |
| Age, years         |            |      | 0.399    |
| ≥ 70               | 11         | 15   |          |
| < 70               | 9          | 5    |          |
| Sex                |            |      | 0.274    |
| Female             | 8          | 14   |          |
| Male               | 11         | 7    |          |
| Tumor size, cm     |            |      | 0.102    |
| ≥ 6                | 6          | 14   |          |
| < 6                | 7          | 13   |          |
| Differentiation    |            |      | 0.062    |
| Well               | 3          | 11   |          |
| Moderate           | 5          | 8    |          |
| Poor               | 2          | 11   |          |
| TNM stage          |            |      | 0.128    |
| I and II           | 4          | 16   |          |
| III and IV         | 15         | 5    |          |

MiR-19b-3p promotes colorectal cancer growth and metastasis

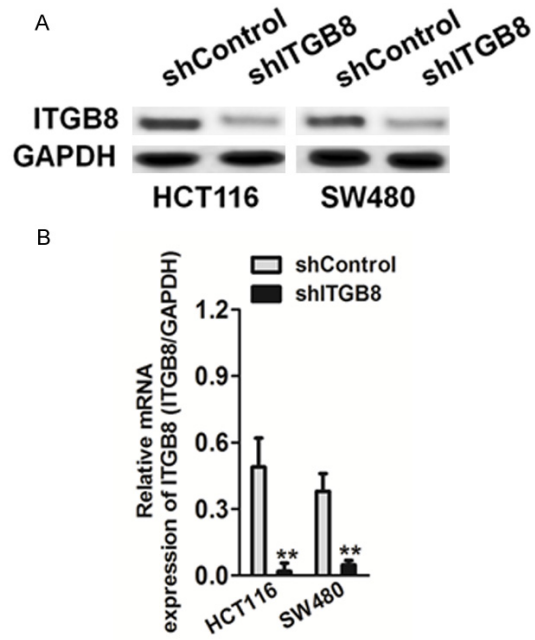

**Supplementary Figure 1.** To knock down ITGB8, shITGB8 and shControl was transfected HCT116 and SW480 cells. The ITGB8 expressing level was detected by western blotting (A) and qRT-PCR (B).
